# Supplementary material for: NEXAFS spectroscopy of ionic liquids: experiments versus calculations
Source: Royal Society of Chemistry journal article supplement (doi:10.1039/c7cp07143d), 2017-01-01
Supplement: c7cp07143d1.pdf [file c7cp07143d1.pdf]

## NEXAFS spectroscopy of ionic liquids: experiments versus calculations

Richard M. Fogarty,<sup>1</sup> Richard P. Matthews,<sup>1</sup> Matthew T. Clough,<sup>1</sup> Claire R. Ashworth,<sup>1</sup>  
Agnieszka Brandt,<sup>2</sup> Paul J. Corbett,<sup>2</sup> Robert G. Palgrave,<sup>3</sup> Richard A. Bourne,<sup>4,5</sup> Thomas W.  
Chamberlain,<sup>5</sup> Tom Vander Hoogerstraete,<sup>6</sup> Paul B. J. Thompson,<sup>7</sup> Patricia A. Hunt,<sup>1</sup>  
Nicholas A. Besley,<sup>8</sup> Kevin R. J. Lovelock.\*<sup>9</sup>

<sup>1</sup> Department of Chemistry, Imperial College London, UK

<sup>2</sup> Department of Chemical Engineering, Imperial College London, UK

<sup>3</sup> Department of Chemistry, University College London, UK

<sup>4</sup> School of Chemical and Process Engineering, University of Leeds, UK

<sup>5</sup> Institute of Process Research and Development, School of Chemistry, University of Leeds, UK

<sup>6</sup> Department of Chemistry, KU Leuven, Belgium

<sup>7</sup> XMaS, UK CRG, ESRF, France, and Department of Physics, University of Liverpool, UK

<sup>8</sup> School of Chemistry, University of Nottingham, UK

<sup>9</sup> Department of Chemistry, University of Reading, UK

Contact E-mail: [k.r.j.lovelock@reading.ac.uk](mailto:k.r.j.lovelock@reading.ac.uk); [nick.besley@nottingham.ac.uk](mailto:nick.besley@nottingham.ac.uk)

### Information relevant to Section 2 of the Main Article

|                                  |   |
|----------------------------------|---|
| Beamline Set-up: I09             | 2 |
| Energy Scale Calibration         | 2 |
| Energy Scale Stability Over Time | 3 |

### Information relevant to Section 3.1 of the Main Article

|                                                  |     |
|--------------------------------------------------|-----|
| Counterion Dependence                            | 4   |
| Fluorescence Yield versus Partial Electron Yield | 4–5 |
| Experimental S 1s and N 1s energies              | 5   |

### Information relevant to Section 3.2 of the Main Article

|                                                                     |       |
|---------------------------------------------------------------------|-------|
| More Experimental vs. Calculations Comparisons for the S 1s Edge    | 6     |
| Comparing Calculations to Each Other and to Experimental Data       | 7     |
| Explaining our Ion Pair and Ion Pair Dimer Calculation Nomenclature | 8–9   |
| Calculated vs. FY Experimental NEXAFS Spectra                       | 10–13 |

### Information relevant to Section 3.3 of the Main Article

|                                                                              |       |
|------------------------------------------------------------------------------|-------|
| Calculated NEXAFS Spectra: Ion Pairs vs. Lone Ions                           | 14–18 |
| UMOs for Two Different [N <sub>4,1,1,0</sub> ][HSO <sub>4</sub> ] Conformers | 18–19 |

|            |    |
|------------|----|
| References | 20 |
|------------|----|

|                      |       |
|----------------------|-------|
| Conformer Structures | 21–30 |
|----------------------|-------|

## Information relevant to Section 2 of the Main Article

### Beamline Set-up: I09

S 1s NEXAFS experiments using partial electron yield (PEY) detection were performed at the Beamline I09 at Diamond Light Source, UK. The pressure during experiments was  $\sim 5 \times 10^{-10}$  mbar. The end-chamber contains a VG Scienta EW4000 HAXPES hemispherical electron analyser. Note that no data from I09 was presented in the main paper, it is used solely in the ESI to demonstrate the similarities between spectra shapes for PEY and fluorescence yield (FY). Furthermore, we make no comments on the absolute energies measured for this data; hence, energy calibration is irrelevant for this data.

### Energy Scale Calibration

Comparing our S 1s FY results to literature values shows that our measured white line energies ( $E_{\text{WL}}$ ) and edge energies ( $E_{\text{NEXAFS}}$ ) are calibrated to the same level as found in the literature.

The S 1s FY NEXAFS spectrum for solid elemental sulfur was very similar to a literature spectrum, in both peak  $h\nu$  and spectrum shape.<sup>1</sup> Clearly, self-absorption occurred for this solid, highly concentrated sample, as was the case for the literature spectrum. For the ILs studied, excellent matches were observed between our FY data (for neat ILs) and literature data (for relatively dilute samples dissolved in water) (where self-absorption was not expected to occur), e.g.  $[\text{MeSO}_4]^-$ ,<sup>2</sup>  $[\text{HSO}_4]^-$ ,<sup>1</sup> and  $[\text{MeSO}_3]^-$ .<sup>1</sup> Therefore, self-absorption for our IL experiments using FY detection does not appear to occur.

For the S 1s edge, our experimental white line energies,  $E_{\text{WL}}(\text{exp})$ , are very similar to those reported in the literature (see Table S1). These similarities between our results and the literature show that the S 1s energy calibration for the results recorded at BM28 is valid.

Our measured cationic nitrogen N 1s  $E_{\text{WL}}(\text{exp}) \sim 401.8$  eV for all four  $[\text{C}_n\text{C}_1\text{Im}][\text{A}]$  ILs is in excellent agreement with the literature value of  $\sim 401.9$  eV,<sup>3-8</sup> demonstrating that our energy calibration for the N 1s NEXAFS results does not need shifting.

| Edge | IL                                                                   | $E_{\text{WL}}$ (ILs in this work) / eV                   | Literature compound                                               | Literature $E_{\text{WL}}$ / eV | Ref.    |
|------|----------------------------------------------------------------------|-----------------------------------------------------------|-------------------------------------------------------------------|---------------------------------|---------|
| S 1s | $[\text{S}_{2,2,2}][\text{NTf}_2]$<br>(sulfonium)                    | 2475.8                                                    | Aqueous $[\text{S}_{1,1,1}]^+$                                    | 2475.5                          | 9       |
|      |                                                                      |                                                           | $[\text{S}_{1,1,\text{propionate}}]^+$                            | 2476.2                          | 10      |
| S 1s | $[\text{C}_2\text{C}_1\text{Im}][\text{MeSO}_3]$<br>(alkylsulfonate) | 2481.6                                                    | Various $[\text{RSO}_3]^-$<br>compounds                           | 2481.7                          | 10      |
| S 1s | $[\text{C}_4\text{C}_1\text{Im}][\text{RSO}_4]$<br>(alkylsulfate)    | 2482.8                                                    | Various $[\text{RSO}_4]^-$<br>compounds                           | 2483.2                          | 10      |
| S 1s | $\text{S}_8$ (solid)                                                 | 2472.9                                                    | $\text{S}_8$ (solid)                                              | 2473.1                          | 1       |
|      |                                                                      |                                                           | $\text{S}_8$ (solid)                                              | 2472.9                          | 11      |
| N 1s | $[\text{C}_n\text{C}_1\text{Im}][\text{A}]$                          | Three ILs<br>gave 401.8 eV<br>and one IL<br>gave 401.7 eV | $[\text{C}_n\text{C}_1\text{Im}][\text{NTf}_2]$ ( $n = 1, 2, 4$ ) | 401.9, 402.0                    | 5-7     |
|      |                                                                      |                                                           | $[\text{C}_4\text{C}_1\text{Im}][\text{BF}_4]$                    | 401.9                           | 3, 8    |
|      |                                                                      |                                                           | $[\text{C}_4\text{C}_1\text{Im}][\text{PF}_6]$                    | 401.9                           | 3, 5    |
|      |                                                                      |                                                           | $[\text{C}_4\text{C}_1\text{Im}]\text{Cl}$                        | 401.9                           | 3, 5    |
|      |                                                                      |                                                           | $[\text{C}_n\text{C}_1\text{Im}]\text{Br}$ ( $n = 2, 4$ )         | 401.9                           | 3, 5, 6 |
|      |                                                                      |                                                           | $[\text{C}_4\text{C}_1\text{Im}]\text{I}$                         | 401.9                           | 7       |

**Table S1.** Comparison of ionic liquid  $E_{\text{WL}}$  values (measured in this work) with literature  $E_{\text{WL}}$  values for related compounds. R = alkyl chain,  $\text{C}_n\text{H}_{2n+1}$ .

## Energy Scale Stability Over Time

Figure S1a shows two S 1s NEXAFS spectra for  $[\text{C}_4\text{C}_1\text{Im}][\text{SCN}]$  taken six months apart using the same methodology (including beamline). These spectra show identical shapes and differences between the spectra for both  $E_{\text{NEXAFS}}$  and  $E_{\text{WL}}$  are within experimental error;  $E_{\text{WL}} = 2474.4$  eV for the January spectrum and 2474.3 eV for the June spectrum,  $E_{\text{NEXAFS}} = 2473.0$  eV for the January spectrum and 2472.9 eV for the June spectrum. These results demonstrate that the beamline energy calibration is not changing over time. All S 1s spectra in the Main Article were recorded during a single beamtime (*i.e.* over the course of a few days); therefore, if the beamline calibration does not change over 6 months it will not change over this far shorter period.

For the N 1s NEXAFS data we have an internal standard for the  $[\text{C}_n\text{C}_1\text{Im}][\text{A}]$  ILs, namely the cationic nitrogen. The cationic N 1s  $E_{\text{WL}}$  was  $\sim 401.8$  eV for all four  $[\text{C}_n\text{C}_1\text{Im}][\text{A}]$  ILs, which demonstrates that our energy calibration is stable over time. Furthermore, Figure S1b shows two N 1s spectra for  $[\text{N}_{4,1,1,0}][\text{HSO}_4]$  taken 12 hours apart. These spectra appear identical to the eye. This observation is strongly supported by  $E_{\text{WL}}$  and  $E_{\text{NEXAFS}}$  being the same (within experimental error) for these two spectra; for the spectra in Figure S1b  $E_{\text{WL}} = 405.6$  eV ( $t = 0$  h) and 405.7 eV ( $t = 12$  h) and  $E_{\text{NEXAFS}} = 405.0$  eV (for both  $t = 0$  h and  $t = 12$  h). All N 1s spectra were taken in a single beamtime (over six days), so instability in energy scale calibration over this timescale would be highly unlikely regardless.

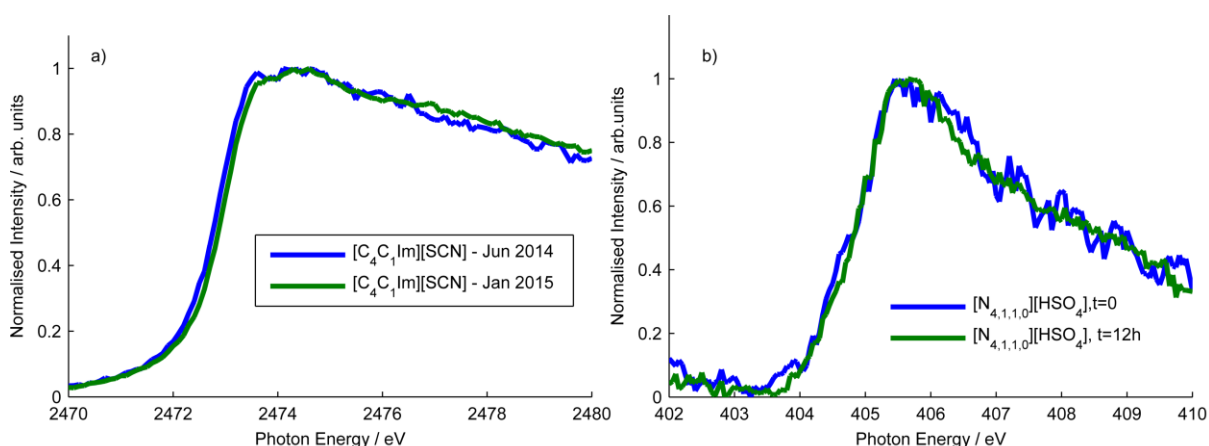

**Figure S1.** (a) Two experimental S 1s edge NEXAFS spectra for  $[\text{C}_4\text{C}_1\text{Im}][\text{SCN}]$  taken 6 months apart under the same conditions. Note the both  $E_{\text{NEXAFS}}$  and  $E_{\text{WL}}$  are the same within experimental error for both spectra (see the text). Spectra were taken at the ESRF using FY detection. (b) Two experimental N 1s edge NEXAFS spectra for  $[\text{N}_{4,1,1,0}][\text{HSO}_4]$  taken 12 hours apart under the same conditions. Note the both  $E_{\text{NEXAFS}}$  and  $E_{\text{WL}}$  are the same within experimental error for both spectra (see the text).

## Information relevant to Section 3.1 of the Main Article

### Counterion Dependence

There is no significant counterion dependence observed for any of the S 1s data recorded here. S 1s NEXAFS spectra for all four  $[C_nC_1Im][NTf_2]$  ILs were similar in terms of both the relative peak areas and energies (Figure S2).

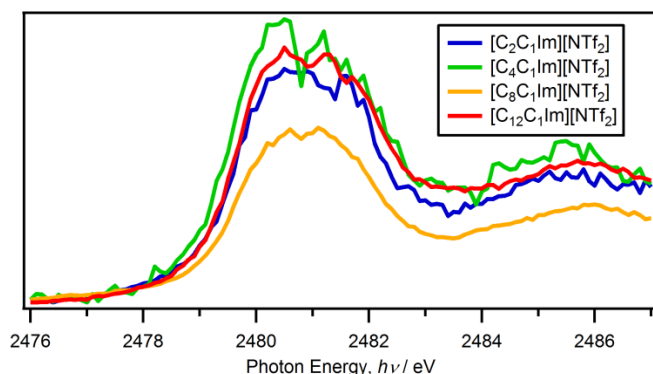

**Figure S2.** Experimental S 1s edge NEXAFS spectra for four  $[C_nC_1Im][NTf_2]$  ILs ( $n = 2, 4, 8, 12$ ) using fluorescence yield (FY) detection.

### Fluorescence Yield versus Partial Electron Yield

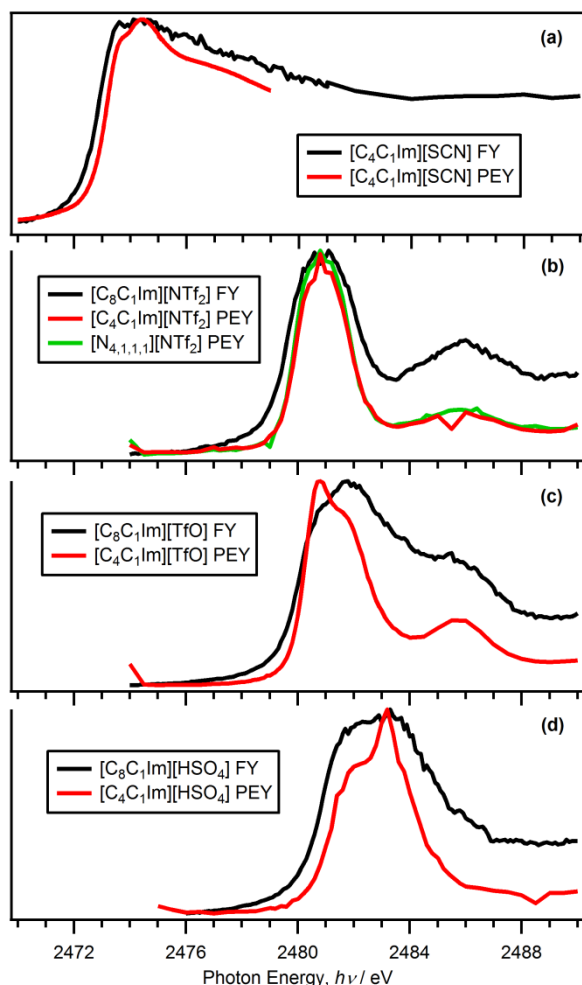



**Figure S3.** Experimental S 1s edge NEXAFS spectra using fluorescence yield (FY) and partial electron yield (PEY) detection. (a)  $[\text{C}_4\text{C}_1\text{Im}][\text{SCN}]$ , (b)  $[\text{cation}][\text{NTf}_2]$ , (c)  $[\text{C}_n\text{C}_1\text{Im}][\text{TfO}]$  and (d)  $[\text{C}_n\text{C}_1\text{Im}][\text{HSO}_4]$ .

Once a single linear energy shift was applied to account for different beamline  $h\nu$  calibrations, the visual match between FY (recorded on BM28 at the ESRF) and PEY (recorded on I09 at Diamond Light Source) detection was good overall for the four ILs studied. Subtle differences in relative peak intensities between FY and PEY detection were observed for  $[\text{C}_n\text{C}_1\text{Im}][\text{HSO}_4]$  and  $[\text{C}_n\text{C}_1\text{Im}][\text{TfO}]$  (Figure S3), which have two possible origins. Firstly, different processes were monitored, *i.e.* FY and PEY, although broadly both monitor the absorption probability (FY and PEY can provide subtly different measures of absorption, as the physical processes following core–hole filling are different<sup>12, 13</sup>). Secondly, the resolution of the two experiments may have been slightly different; it would appear that the resolution for PEY detection was slightly better than for FY detection. These results demonstrate that our calculations are valid whether either FY or PEY detection methods are used.

### Experimental S 1s and N 1s energies

| System                                           | Experimental S 1s $E_{\text{NEXAFS}}(\text{exp})$<br>$\pm 0.1$ / eV | Experimental S 1s $E_{\text{WL}}(\text{exp}) \pm 0.2$ /<br>eV |
|--------------------------------------------------|---------------------------------------------------------------------|---------------------------------------------------------------|
| Solid $\text{S}_8$                               | 2471.8                                                              | 2472.9                                                        |
| $[\text{C}_4\text{C}_1\text{Im}][\text{SCN}]$    | 2472.9                                                              | 2474.3                                                        |
| $[\text{S}_{2,2,2}][\text{NTf}_2]$               | 2475.0/2479.5 (cation/anion)                                        | 2475.8/2480.8 (cation/anion)                                  |
| $[\text{C}_8\text{C}_1\text{Im}][\text{NTf}_2]$  | 2479.7                                                              | 2481.1                                                        |
| $[\text{C}_8\text{C}_1\text{Im}][\text{TfO}]$    | 2480.1                                                              | 2481.9                                                        |
| $[\text{C}_2\text{C}_1\text{Im}][\text{MeSO}_3]$ | 2480.1                                                              | 2481.6                                                        |
| $[\text{C}_4\text{C}_1\text{Im}][\text{MeSO}_4]$ | 2480.4                                                              | 2482.8                                                        |
| $[\text{C}_8\text{C}_1\text{Im}][\text{HSO}_4]$  | 2480.9                                                              | 2483.3                                                        |

**Table S2.** Experimental S 1s  $E_{\text{NEXAFS}}(\text{exp})$  values and  $E_{\text{WL}}(\text{exp})$  values for all systems studied. For systems with a sulfur atom on both cation and anion, the cationic value is to the left of the “/”, the anionic value to the right.  $E_{\text{NEXAFS}}(\text{exp})$  and  $E_{\text{WL}}(\text{exp})$  were determined from fluorescence yield (FY) data.

| System                                                   | Experimental N 1s $E_{\text{NEXAFS}}(\text{exp})$<br>$\pm 0.1$ / eV | Experimental N 1s $E_{\text{WL}}(\text{exp}) \pm 0.2$ /<br>eV |
|----------------------------------------------------------|---------------------------------------------------------------------|---------------------------------------------------------------|
| $[\text{C}_8\text{C}_1\text{Im}][\text{C}(\text{CN})_3]$ | 401.4/398.8 (cation/anion)                                          | 401.7/399.0 (cation/anion)                                    |
| $[\text{C}_8\text{C}_1\text{Im}]\text{Cl}$               | 401.5                                                               | 401.8                                                         |
| $[\text{C}_4\text{C}_1\text{Im}][\text{SCN}]$            | 401.5/399.3 (cation/anion)                                          | 401.8/399.5 (cation/anion)                                    |
| $[\text{C}_8\text{C}_1\text{Im}][\text{NTf}_2]$          | 401.5/X (cation/anion)                                              | 401.8                                                         |
| $[\text{P}_{6,6,6,14}][\text{NO}_3]$                     | 404.8                                                               | 405.1                                                         |
| $[\text{N}_{2,2,1,0}][\text{TfO}]$                       | 404.8                                                               | 406.0                                                         |
| $[\text{N}_{4,1,1,0}][\text{HSO}_4]$                     | 404.9                                                               | 405.7                                                         |

**Table S3.** Experimental N 1s  $E_{\text{NEXAFS}}(\text{exp})$  values for all systems studied. For systems with a nitrogen atom on both cation and anion, the cationic value is to the left of the “/”, the anionic value to the right. Edge energies were determined using partial electron yield (PEY) data. The X for  $[\text{C}_8\text{C}_1\text{Im}][\text{NTf}_2]$  demonstrates that no well–resolved peak was observed for the  $[\text{NTf}_2]^-$  anion.

## Information relevant to Section 3.2 of the Main Article

### More Experimental vs. Calculations Comparisons for the S 1s Edge

The calculated S 1s spectra for  $[\text{C}_4\text{C}_1\text{Im}][\text{MeSO}_3]$  vary significantly between lone ions and ion pairs (Figure S3h). For  $[\text{C}_4\text{C}_1\text{Im}][\text{MeSO}_3]$  the spectrum calculated with lone ions contains two peaks ( $\sim 2477.7$  eV and  $\sim 2480.6$  eV) compared to a single peak for the ion pair ( $\sim 2480.6$  eV). For  $[\text{C}_4\text{C}_1\text{Im}][\text{MeSO}_3]$  the lone ions system was also found to be too small for calculating S 1s NEXAFS spectra, predicting a peak at  $\sim 2477$  eV which is absent in experimental and ion pair calculated spectra (Figure S3h).

For the S 1s edge, the only IL to show noteworthy ion pair conformational dependence is the  $[\text{S}_{2,2,2}]^+$  cation for  $[\text{S}_{2,2,2}][\text{NTf}_2]$  (Figure S3a); the  $[\text{NTf}_2]^-$  anion shows no conformational dependence for  $[\text{S}_{2,2,2}][\text{NTf}_2]$  (Figure S3e). Both conformers for  $[\text{S}_{2,2,2}][\text{NTf}_2]$  give a peak at 2474.9 eV. A relatively subtle but noticeable difference occurs at larger  $h\nu$ . This dependence arises due to two very different conformers, either with the anion closest to the cationic sulfur atom or with the anion closest to the cationic alkyl chains. Such a conformer dependence is also observed for cationic sulfur atomic charges for  $[\text{S}_{2,2,2}][\text{NTf}_2]$ .<sup>14</sup>

The shape matches between S 1s experimental spectra and calculated spectra (for both lone ions and ion pairs) for  $[\text{S}_{2,2,2}][\text{NTf}_2]$ ,  $[\text{C}_4\text{C}_1\text{Im}][\text{NTf}_2]$  and  $[\text{C}_4\text{C}_1\text{Im}][\text{TfO}]$  are excellent (Figure S6). For both  $[\text{C}_4\text{C}_1\text{Im}][\text{NTf}_2]$  and  $[\text{S}_{2,2,2}][\text{NTf}_2]$ , lone ions and ion pairs are very similar in terms of both peak shape and peak  $h\nu$  (Figure S3). Effects of using ion pair calculations (rather than lone ions) on calculated S 1s spectra were similar for three ILs, ( $[\text{C}_4\text{C}_1\text{Im}][\text{MeSO}_4]$ ,  $[\text{C}_4\text{C}_1\text{Im}][\text{TfO}]$  and  $[\text{C}_4\text{C}_1\text{Im}][\text{HSO}_4]$ ) (Figure S3). For example, for both lone  $[\text{MeSO}_4]^-$  ions and  $[\text{C}_4\text{C}_1\text{Im}][\text{MeSO}_4]$  ion pairs two peaks are observed, but small differences are observed in the peak  $h\nu$  separations (Figure S3). The two peaks are separated by  $\sim 3.4$  eV for lone  $[\text{MeSO}_4]^-$  ions and by  $\sim 2.0$  eV for both  $[\text{C}_4\text{C}_1\text{Im}][\text{MeSO}_4]$  ion pairs.

### Comparing Calculations to Each Other and to Experimental Data

| Ionic liquid                                           | Lone ion calculations vs. ion pair calculations                                                  | Significant ion pair conformational dependence? | Shift for ion pair calculations to match experimental spectra / eV |
|--------------------------------------------------------|--------------------------------------------------------------------------------------------------|-------------------------------------------------|--------------------------------------------------------------------|
| [C <sub>4</sub> C <sub>1</sub> Im][SCN]                | <u>Different.</u> Very large peak in lone ion calculations not present in ion pair calculations. | No                                              | 0.0                                                                |
| [C <sub>n</sub> C <sub>1</sub> Im][NTf <sub>2</sub> ]  | Very similar                                                                                     | No                                              | +1.0                                                               |
| [C <sub>n</sub> C <sub>1</sub> Im][TfO]                | Very small differences                                                                           | No                                              | +1.3                                                               |
| [C <sub>n</sub> C <sub>1</sub> Im][MeSO <sub>3</sub> ] | <u>Different.</u> Peak in lone ion calculations not present in ion pair calculations.            | No                                              | +1.1                                                               |
| [C <sub>4</sub> C <sub>1</sub> Im][MeSO <sub>4</sub> ] | Very small differences                                                                           | No                                              | +1.2                                                               |
| [C <sub>n</sub> C <sub>1</sub> Im][HSO <sub>4</sub> ]  | Very small differences                                                                           | No                                              | +1.3                                                               |
| [S <sub>2,2,2</sub> ][NTf <sub>2</sub> ]               | Almost identical                                                                                 | Very subtle at larger $h\nu$ .                  | +1.0                                                               |

**Table S4.** S 1s NEXAFS results: comparing calculations to each other and to experimental data.

| Ionic liquid                                            | Lone ion calculations vs. ion pair calculations                               | Significant ion pair conformational dependence?                                       | Shift for ion pair calculations to match experimental spectra / eV |
|---------------------------------------------------------|-------------------------------------------------------------------------------|---------------------------------------------------------------------------------------|--------------------------------------------------------------------|
| [P <sub>6,6,6,14</sub> ][NO <sub>3</sub> ]              | Very similar                                                                  | No                                                                                    | +0.8                                                               |
| [C <sub>n</sub> C <sub>1</sub> Im]Cl                    | Very similar                                                                  | <u>Yes.</u> Back butyl conformer gives two peaks. Other two conformers give one peak. | -0.9                                                               |
| [C <sub>n</sub> C <sub>1</sub> Im][NTf <sub>2</sub> ]   | Very similar                                                                  | No                                                                                    | -0.8                                                               |
| [C <sub>n</sub> C <sub>1</sub> Im][C(CN) <sub>3</sub> ] | Very similar                                                                  | No                                                                                    | -0.8                                                               |
| [C <sub>4</sub> C <sub>1</sub> Im][SCN]                 | Very similar                                                                  | <u>Yes.</u> Sf conformer gives two peaks. CNbot gives one peak.                       | -0.9                                                               |
| [N <sub>4,1,1,0</sub> ][HSO <sub>4</sub> ]              | <u>Yes.</u> NH-O ion pair conformers give one peak. Lone ions give two peaks. | <u>Yes.</u> NH-O conformers give one peak. Alkyl-O conformers give two peaks.         | -0.4                                                               |
| [N <sub>2,2,1,0</sub> ][TfO]                            | <u>Yes.</u> NH-O ion pair conformers give one peak. Lone ions give two peaks. | <u>Yes.</u> NH-O conformers give one peak. Alkyl-O conformers give two peaks.         | -0.4                                                               |

**Table S5.** N 1s NEXAFS results: comparing calculations to each other and to experimental data.

## Nomenclature used for labelling ion pair and ion pair dimer calculations

The three  $[\text{C}_4\text{C}_1\text{Im}]\text{Cl}$  ion pair structures are labelled Front, Top and Back–Butyl respectively. The name refers to the position of the anion relative to the imidazolium ring. “Front” refers to  $\text{Cl}^-$  sitting in the plane of the imidazolium ring near the  $\text{C}^2\text{--H}$  group (Figure S4 for atomic numbering). “Top” refers to the  $\text{Cl}^-$  sitting above the imidazolium ring plane; “above” is determined by the position of the alkyl group, the alkyl group and  $\text{Cl}^-$  both being on the same side of the imidazolium plane makes this a “top” conformer. The “Back–Butyl” name indicates that  $\text{Cl}^-$  is in the imidazolium ring plane, but on the opposite side to the  $\text{C}^2\text{--H}$  group (hence, “back” rather than “front”). The “butyl” part of “Back–Butyl” refers to the  $\text{Cl}^-$  being closer to the imidazolium alkyl chain than the methyl group. This nomenclature has been used in previous works, hence these names were chosen for consistency as well as clarity.<sup>15–17</sup>

The three  $[\text{C}_4\text{C}_1\text{Im}][\text{SCN}]$  structures are labelled Sf, Nf and CNbot. These names refer to the position of the anion, relative to the cation. “Sf” is short for “Sulfur front”, indicating that the sulfur group of  $[\text{SCN}]^-$  interacts with the  $\text{C}^2\text{--H}$  (“front”) group of the imidazolium cation. Similarly Nf is short for “Nitrogen front”, indicating that the nitrogen group of  $[\text{SCN}]^-$  interacts with the  $\text{C}^2\text{--H}$  (“front”) group of the imidazolium cation. “CNbot” means that the anion sits “below” the imidazolium ring plane; it is “below” (rather than above) as the butyl group is on the opposite side of imidazolium plane. This nomenclature has previously been employed in another publication, hence is continued here for reasons of consistency.<sup>14</sup>

The  $[\text{N}_{4,1,1,0}][\text{HSO}_4]$  conformers are divided into two groups; NH–O and Alkyl–O. The NH–O conformers involve an interaction between the ammonium N–H group and an oxygen group on the anion. The Alkyl–O conformers do not possess this NH–O interaction, but instead possess only C–H–O intermolecular interactions (hence the name Alkyl–O).

The  $[\text{C}_2\text{C}_1\text{Im}]\text{Cl}$  dimer conformers are named in a consistent manner based on previous work (see reference<sup>18</sup> for a more thorough explanation of the naming scheme).<sup>18</sup> An example name is “D\_BtF\_FBt\_A”. The first letter denotes the general structural motif, in the current work this is either “diagonal”(D) or “Middle”(M). A diagonal motif is one where the ion positions essentially form a rectangle, with an ion in each corner. The middle motif involves one cation ring sitting above the other, and the anions being in between the two ring planes. The “BtF” part of the name refers to the positions of both anions to one of the cations, the same names are used here as in the case of  $[\text{C}_4\text{C}_1\text{Im}]\text{Cl}$  ion pairs; Bt means “Bottom”, T means “Top”, F means “Front” and B means “Back” (and represents a similar position to back–butyl). Therefore the “BtF” means anion 1 is Bottom with respect to cation 1, and anion 2 is “Front” with respect to cation 1. Similarly, the “FBt” part of the name means anion 1 is “Front” with respect to cation 2 and “Bottom” with respect to cation 2. Note the assignment of one ion to “cation 1” or “cation 2” is arbitrary (for example, this conformer could also have been named D\_FBt\_BtF\_A). The final letter in a dimer name corresponds to the relative positions of the cations. “A” means antiparallel (ring planes are parallel but the two  $\text{C}^2\text{--H}$  groups face opposite directions), “P” means parallel (ring planes are parallel but the two  $\text{C}^2\text{--H}$  groups face the same direction), “R” means rotated (ring planes are parallel but the direction of one  $\text{C}^2\text{--H}$  group is  $\sim 90^\circ$  to the other), “T” stands for T-shaped (the imidazolium ring planes are  $\sim 90^\circ$  to each other).

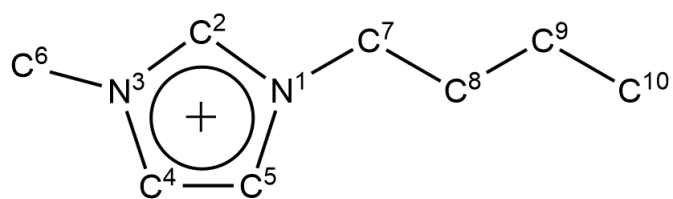

**Figure S4:** Numbering used for the  $[\text{C}_4\text{C}_1\text{Im}]^+$  cation (we employ the same ring atom numbering for the  $[\text{C}_2\text{C}_1\text{Im}]^+$  cation used in  $[\text{C}_2\text{C}_1\text{Im}]\text{Cl}$  dimers).

## Calculated vs. FY Experimental NEXAFS Spectra

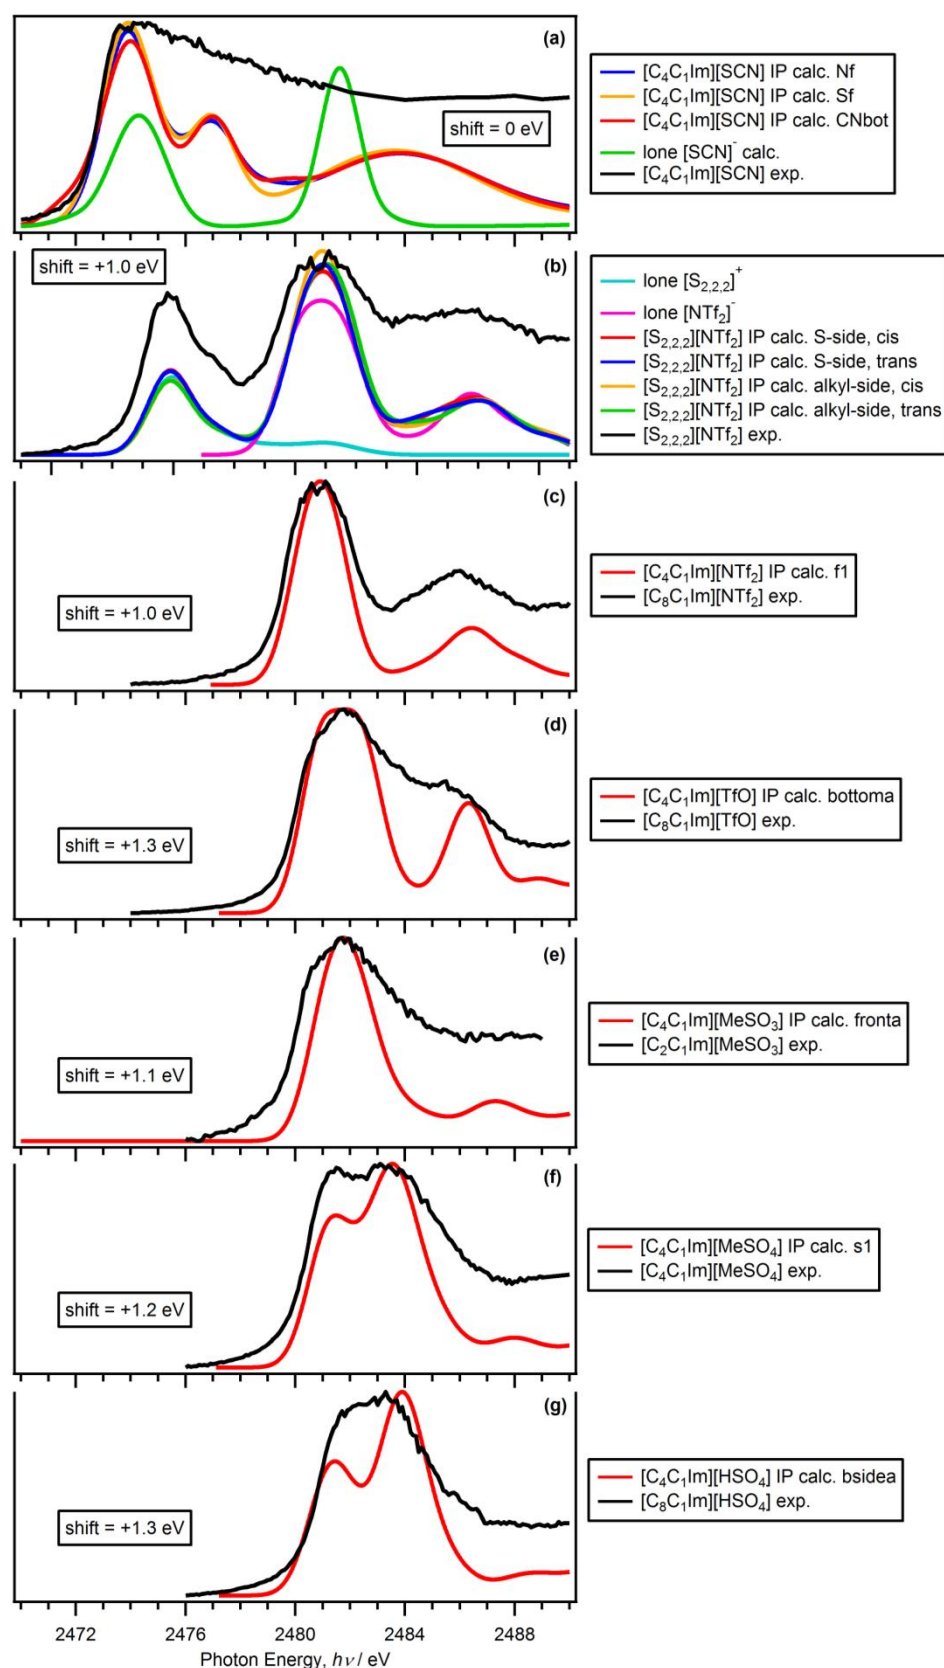

**Figure S5.** S 1s calculated vs. FY experimental NEXAFS spectra. Shifts for the calculated spectra are given in each graph. (a)  $[C_4C_1Im][SCN]$ , (b)  $[S_{2,2,2}][NTf_2]$  (For S-side conformers,  $[NTf_2]^-$  interacts directly with the sulfur centre in the cation. For alkyl-side conformers,  $[NTf_2]^-$  sits further from the

sulfur centre in the cation and interacts only with the alkyl chains.<sup>14</sup>), (c) [C<sub>4</sub>C<sub>1</sub>Im][NTf<sub>2</sub>], (d) [C<sub>4</sub>C<sub>1</sub>Im][TfO], (e) [C<sub>4</sub>C<sub>1</sub>Im][MeSO<sub>3</sub>], (f) [C<sub>4</sub>C<sub>1</sub>Im][MeSO<sub>4</sub>], (g) [C<sub>4</sub>C<sub>1</sub>Im][HSO<sub>4</sub>].

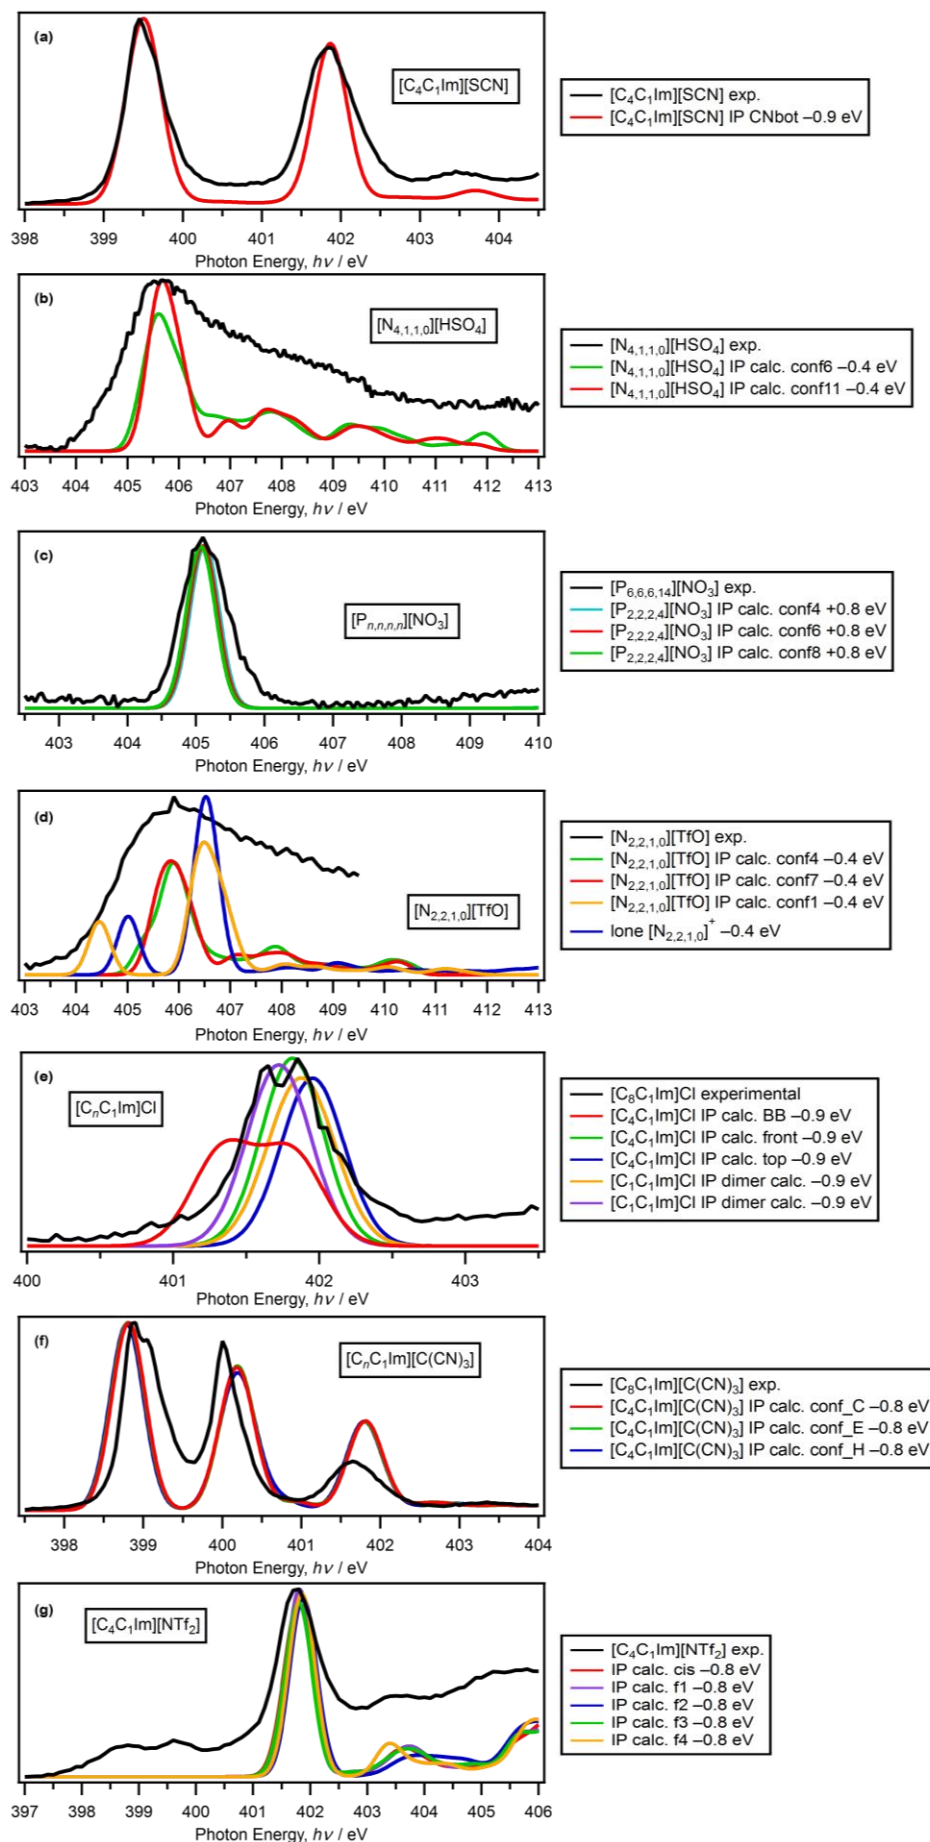



**Figure S6.** N 1s calculated vs. PEY experimental NEXAFS spectra. Shifts for the calculated spectra are given in each graph. (a)  $[\text{C}_4\text{C}_1\text{Im}][\text{SCN}]$ , (b)  $[\text{N}_{4,1,1,0}][\text{HSO}_4]$ , (c)  $[\text{P}_{2,2,2,4}][\text{NO}_3]$  ion pair calculations vs.  $[\text{P}_{6,6,6,14}][\text{NO}_3]$  experimental, (d)  $[\text{N}_{2,2,1,0}][\text{TfO}]$ , (e)  $[\text{C}_4\text{C}_1\text{Im}]\text{Cl}$ , (f)  $[\text{C}_4\text{C}_1\text{Im}][\text{C}(\text{CN})_3]$ , (g)  $[\text{C}_4\text{C}_1\text{Im}][\text{NTf}_2]$ .

## **Information relevant to Section 3.3 of the Main Article**

**Calculated NEXAFS Spectra: Ion Pairs vs. Lone Ions**

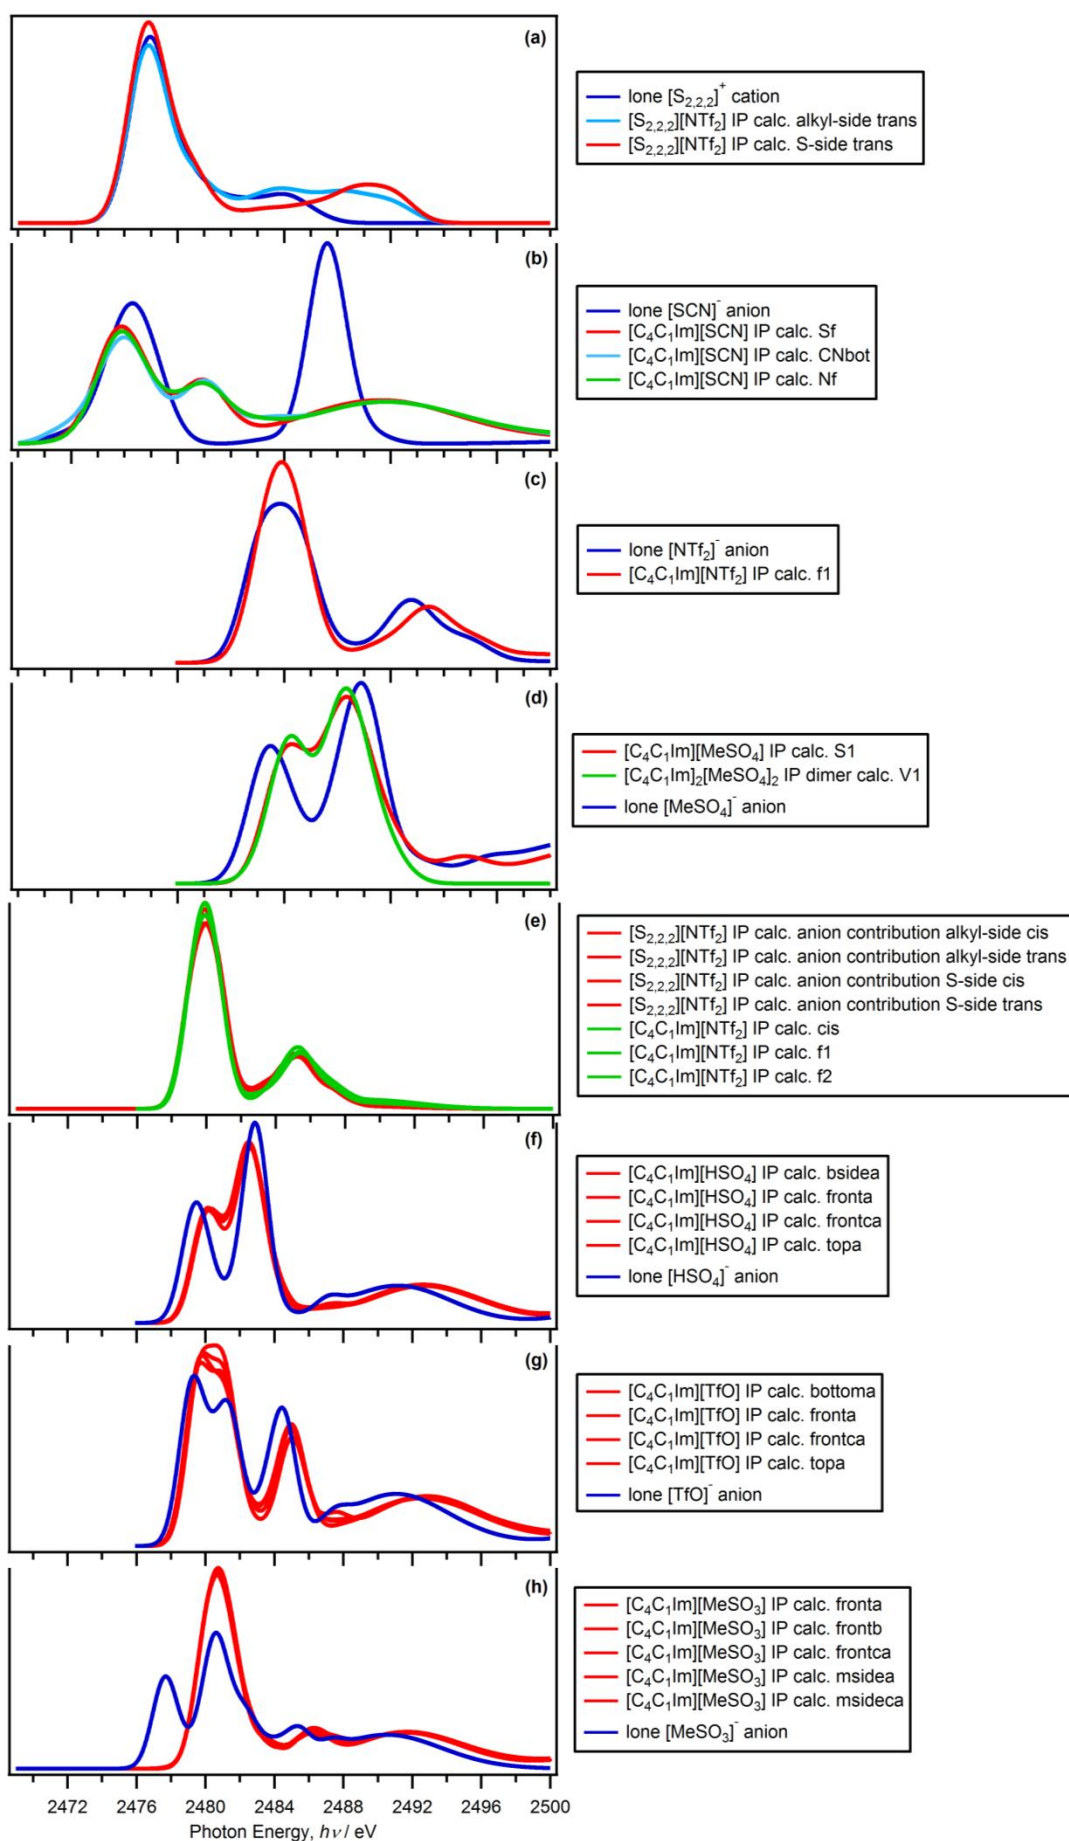

**Figure S7.** S 1s calculated NEXAFS spectra: ion pairs vs. lone ions. (a)  $[S_{2,2,2}][NTf_2]$  ion pairs vs. lone  $[S_{2,2,2}]^+$ , (b)  $[C_4C_1Im][SCN]$  vs. lone  $[SCN]^-$ , (c)  $[C_4C_1Im][NTf_2]$  vs. lone  $[NTf_2]^-$ , (d)  $[C_4C_1Im][MeSO_4]$  ion pairs vs.  $[C_4C_1Im][MeSO_4]$  ion pair dimers vs. lone  $[MeSO_4]^-$ , (e)  $[S_{2,2,2}][NTf_2]$  anion contribution vs.  $[C_4C_1Im][NTf_2]$  anion contribution, (f)  $[C_4C_1Im][HSO_4]$  vs. lone  $[HSO_4]^-$ , (g)  $[C_4C_1Im][TfO]$  vs. lone  $[TfO]^-$ , (h)  $[C_4C_1Im][MeSO_3]$  vs. lone  $[MeSO_3]^-$ .

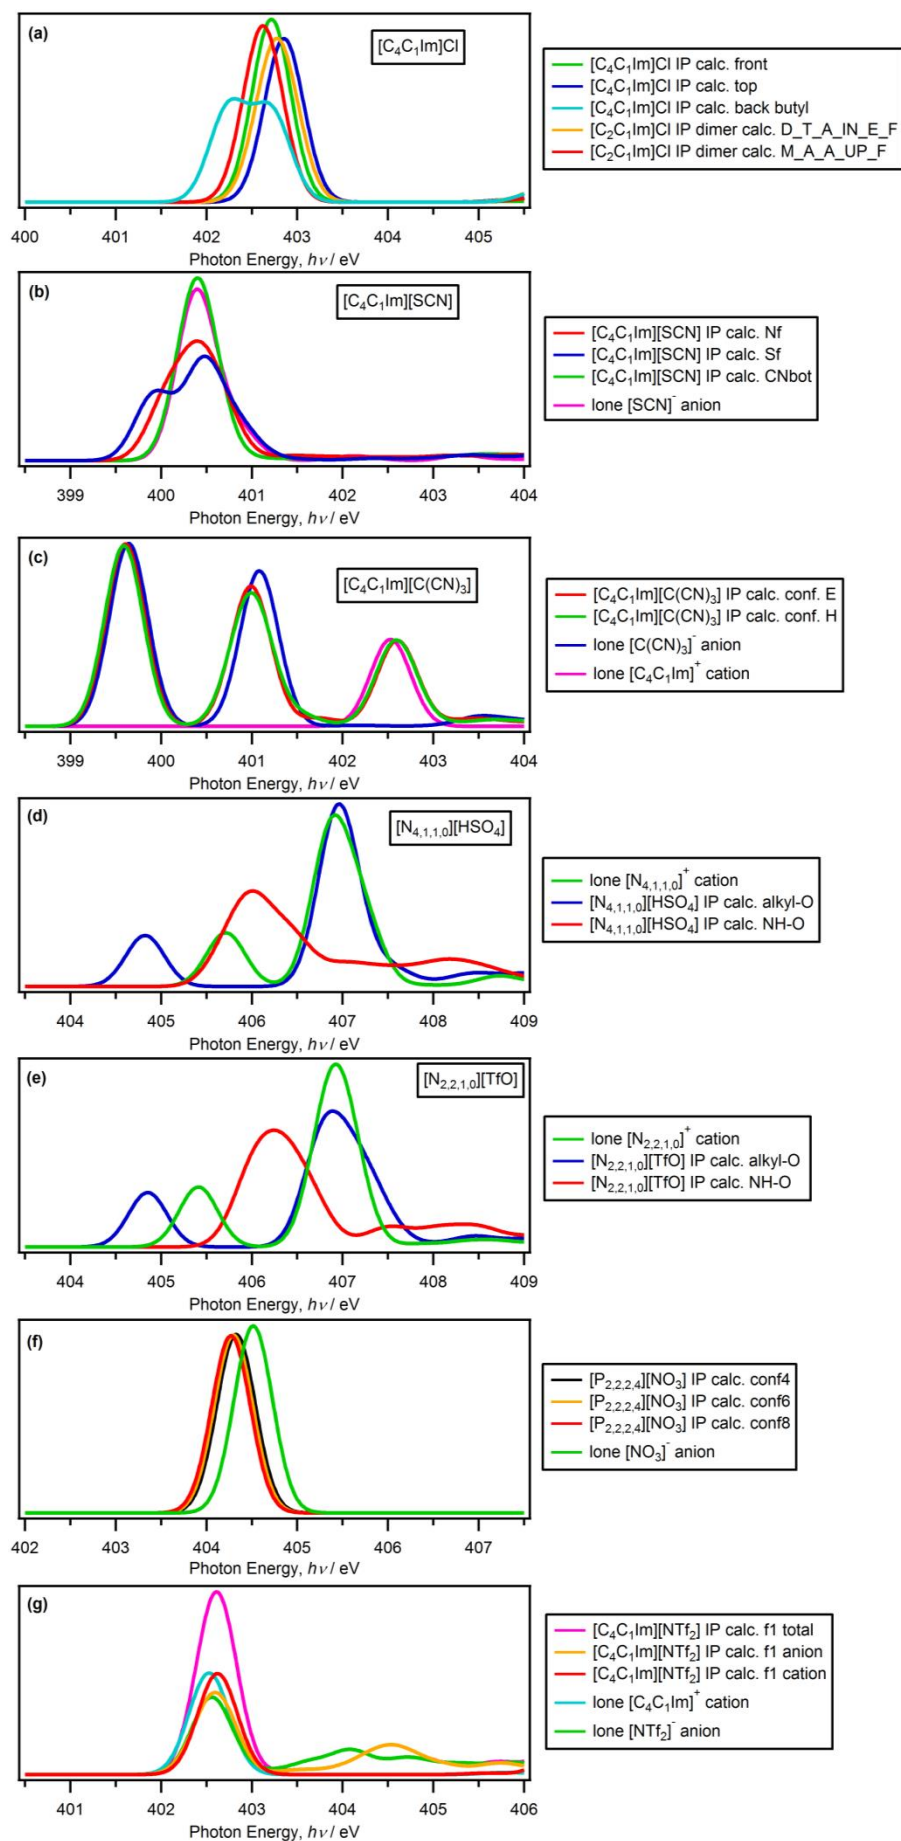

**Figure S8.** N 1s calculated NEXAFS spectra: ion pairs vs. lone ions. (a)  $[\text{C}_4\text{C}_1\text{Im}]\text{Cl}$  ion pairs vs.  $[\text{C}_2\text{C}_1\text{Im}]\text{Cl}$  ion pair dimers vs. lone  $[\text{C}_4\text{C}_1\text{Im}]^+$ , (b)  $[\text{C}_4\text{C}_1\text{Im}][\text{SCN}]$  vs. lone  $[\text{C}_4\text{C}_1\text{Im}]^+$ , (c)  $[\text{C}_4\text{C}_1\text{Im}][\text{C}(\text{CN})_3]$  vs. lone  $[\text{C}_4\text{C}_1\text{Im}]^+$ , (d)  $[\text{N}_{4,1,1,0}][\text{HSO}_4]$  ion pairs vs. lone  $[\text{N}_{4,1,1,0}]^+$ , (e)  $[\text{N}_{2,2,1,0}][\text{TfO}]$  ion pairs vs. lone  $[\text{N}_{2,2,1,0}]^+$ , (f)  $[\text{P}_{2,2,2,4}][\text{NO}_3]$  vs. lone  $[\text{NO}_3]^-$ , (g)  $[\text{C}_4\text{C}_1\text{Im}][\text{NTf}_2]$  ion pair total vs.  $[\text{C}_4\text{C}_1\text{Im}][\text{NTf}_2]$  ion pair anion contribution vs.  $[\text{C}_4\text{C}_1\text{Im}][\text{NTf}_2]$  ion pair cation contribution vs. lone  $[\text{NTf}_2]^-$  vs. lone  $[\text{C}_4\text{C}_1\text{Im}]^+$ .

### UMOs for Two Different $[\text{N}_{4,1,1,0}][\text{HSO}_4]$ Conformers

‘Alkyl–O, Conf 1’:

‘NH–O, Conf 6’:

LUMO

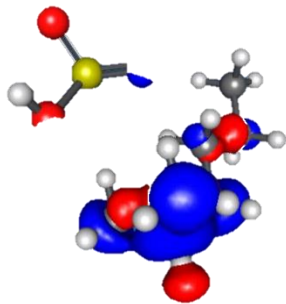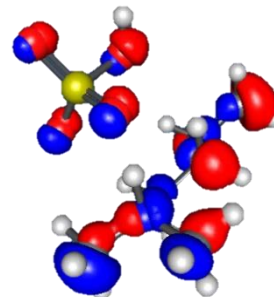

LUMO+1

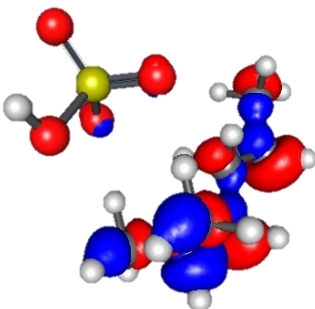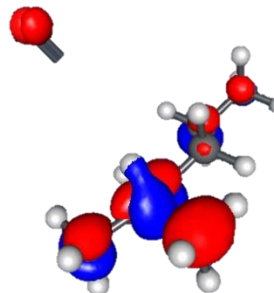

LUMO+2

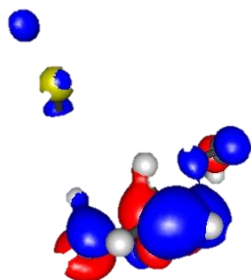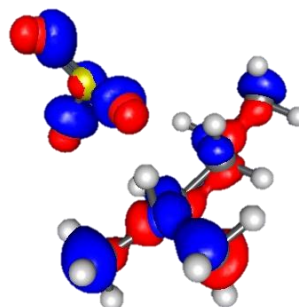

LUMO+4

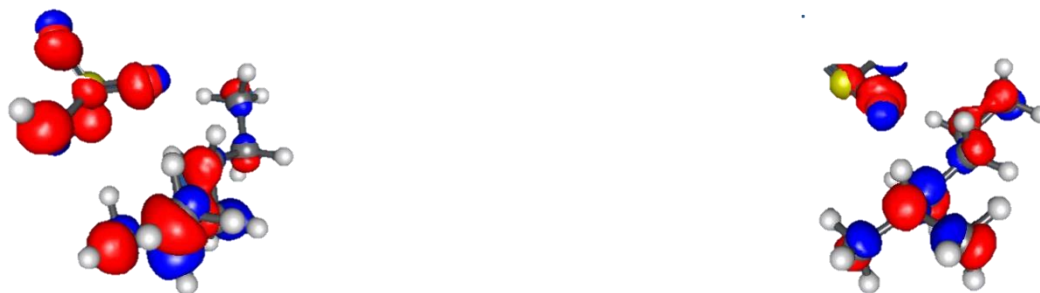

**Figure S9.** Selected UMOs for  $[N_{4,1,1,0}][HSO_4]$ : images of the four lowest energy UMOs for the two conformers.

Figure S9 shows that the orbitals for the conf6 configuration are more delocalised across both the anion and the cation compared with conf1. For the conf6 configuration there is good evidence for a strong hydrogen bond between anion and cation. This observation rationalises why the conf6 spectra is very different from the lone cation spectrum.

## References

1. F. Jalilehvand, *Chem. Soc. Rev.*, 2006, **35**, 1256-1268.
2. P. Frank, B. Hedman and K. O. Hodgson, *Inorg. Chem.*, 1999, **38**, 260-270.
3. F. Rodrigues, G. M. do Nascimento and P. S. Santos, *J. Electron Spectrosc. Relat. Phenom.*, 2007, **155**, 148-154.
4. F. Rodrigues, G. M. do Nascimento and P. S. Santos, *Macromol. Rapid Commun.*, 2007, **28**, 666-669.
5. F. Rodrigues, D. Galante, G. M. do Nascimento and P. S. Santos, *J. Phys. Chem. B*, 2012, **116**, 1491-1498.
6. Y. Horikawa, T. Tokushima, O. Takahashi, H. Hoke and T. Takamuku, *J. Phys. Chem. B*, 2016, **120**, 7480-7487.
7. C. Ehler, M. Holzweber, A. Lippitz, W. E. S. Unger and P. Saalfrank, *Phys. Chem. Chem. Phys.*, 2016, **18**, 8654-8661.
8. M. Wagstaffe, M. J. Jackman, K. L. Syres, A. Generalov and A. G. Thomas, *ChemPhysChem*, 2016, **17**, 3430-3434.
9. R. Sarangi, P. Frank, K. O. Hodgson and B. Hedman, *Inorg. Chim. Acta*, 2008, **361**, 956-964.
10. A. Vairavamurthy, *Spectrosc. Acta Pt. A-Molec. Biomolec. Spectr.*, 1998, **54**, 2009-2017.
11. R. A. Mori, E. Paris, G. Giuli, S. G. Eeckhout, M. Kavcic, M. Zitnik, K. Bucar, L. G. M. Pettersson and P. Glatzel, *Anal. Chem.*, 2009, **81**, 6516-6525.
12. R. Golnak, S. I. Bokarev, R. Seidel, J. Xiao, G. Grell, K. Atak, I. Unger, S. Thurmer, S. G. Aziz, O. Kuhn, B. Winter and E. F. Aziz, *Sci Rep*, 2016, **6**, 8.
13. R. Golnak, J. Xiao, K. Atak, I. Unger, R. Seidel, B. Winter and E. F. Aziz, *J. Phys. Chem. A*, 2016, **120**, 2808-2814.
14. R. M. Fogarty, R. Rowe, R. P. Matthews, M. T. Clough, C. R. Ashworth, A. Brandt, P. J. Corbett, R. G. Palgrave, E. F. Smith, R. A. Bourne, T. W. Chamberlain, P. Thompson, P. A. Hunt and K. R. J. Lovelock, *Faraday Discuss.*, 2017, DOI: 10.1039/C1037FD00155J.
15. P. A. Hunt and I. R. Gould, *J. Phys. Chem. A*, 2006, **110**, 2269-2282.
16. P. A. Hunt, B. Kirchner and T. Welton, *Chem.-Eur. J.*, 2006, **12**, 6762-6775.
17. P. A. Hunt, I. R. Gould and B. Kirchner, *Aust. J. Chem.*, 2007, **60**, 9-14.
18. R. P. Matthews, T. Welton and P. A. Hunt, *Phys. Chem. Chem. Phys.*, 2015, **17**, 14437-14453.



## Conformer Structures

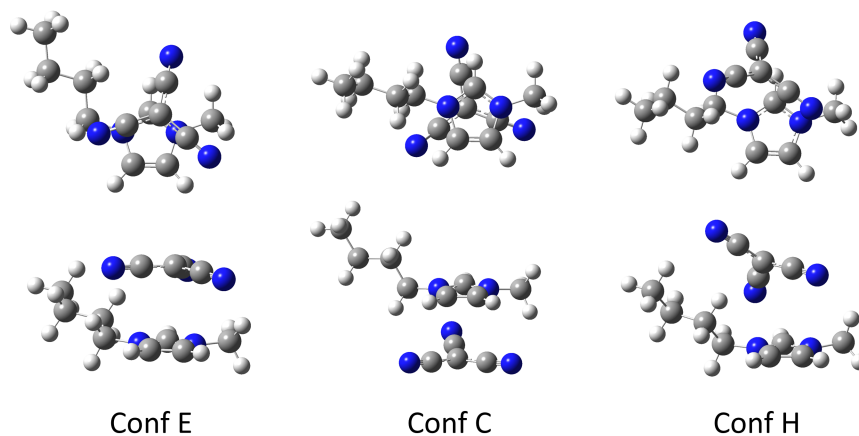

Figure S10: Optimised Ion Pair conformers for  $[\text{C}_4\text{C}_1\text{Im}][\text{C}(\text{CN})_3]$ .

| Conformer | $\Delta E(\text{ZPE}) / \text{kJ mol}^{-1}$ | $\Delta E / \text{kJ mol}^{-1}$ | $\Delta G / \text{kJ mol}^{-1}$ |
|-----------|---------------------------------------------|---------------------------------|---------------------------------|
| Conf E    | 0.0                                         | 0.0                             | 0.0                             |
| Conf C    | 2.1                                         | 2.8                             | -2.6                            |
| Conf H    | 6.8                                         | 6.9                             | 3.0                             |

Table S6: Relative energies for  $[\text{C}_4\text{C}_1\text{Im}][\text{C}(\text{CN})_3]$  Ion Pair conformers.

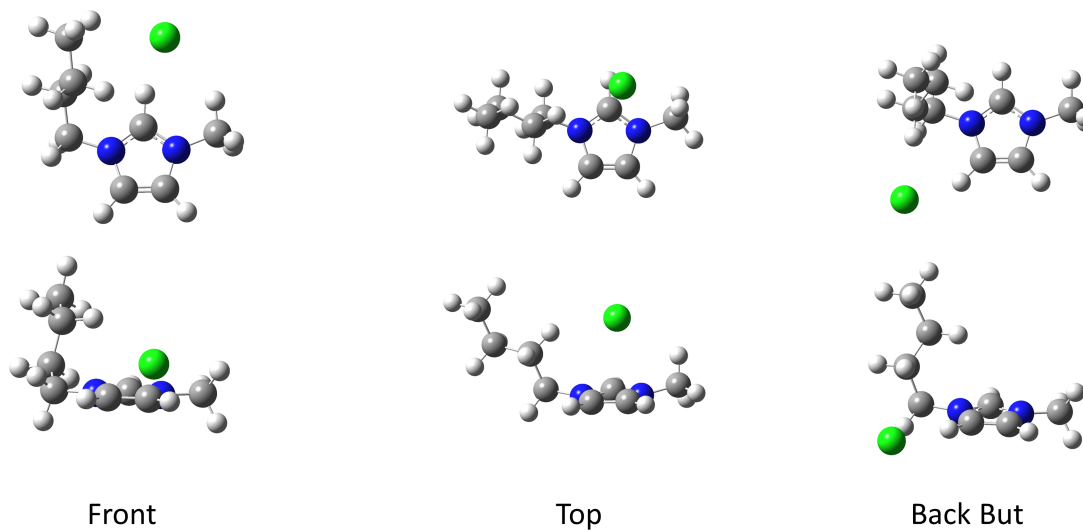

Figure S11: Optimised Ion Pair conformers for  $[\text{C}_4\text{C}_1\text{Im}] \text{Cl}$ .

| Conformer  | $\Delta E(\text{ZPE}) / \text{kJ mol}^{-1}$ | $\Delta E / \text{kJ mol}^{-1}$ | $\Delta G / \text{kJ mol}^{-1}$ |
|------------|---------------------------------------------|---------------------------------|---------------------------------|
| Front      | 0.0                                         | 0.0                             | 0.0                             |
| Top        | 4.6                                         | 3.4                             | 4.8                             |
| Back Butyl | 37.6                                        | 38.1                            | 35.3                            |

Table S7: Relative energies for  $[\text{C}_4\text{C}_1\text{Im}] \text{Cl}$  Ion Pair conformers.

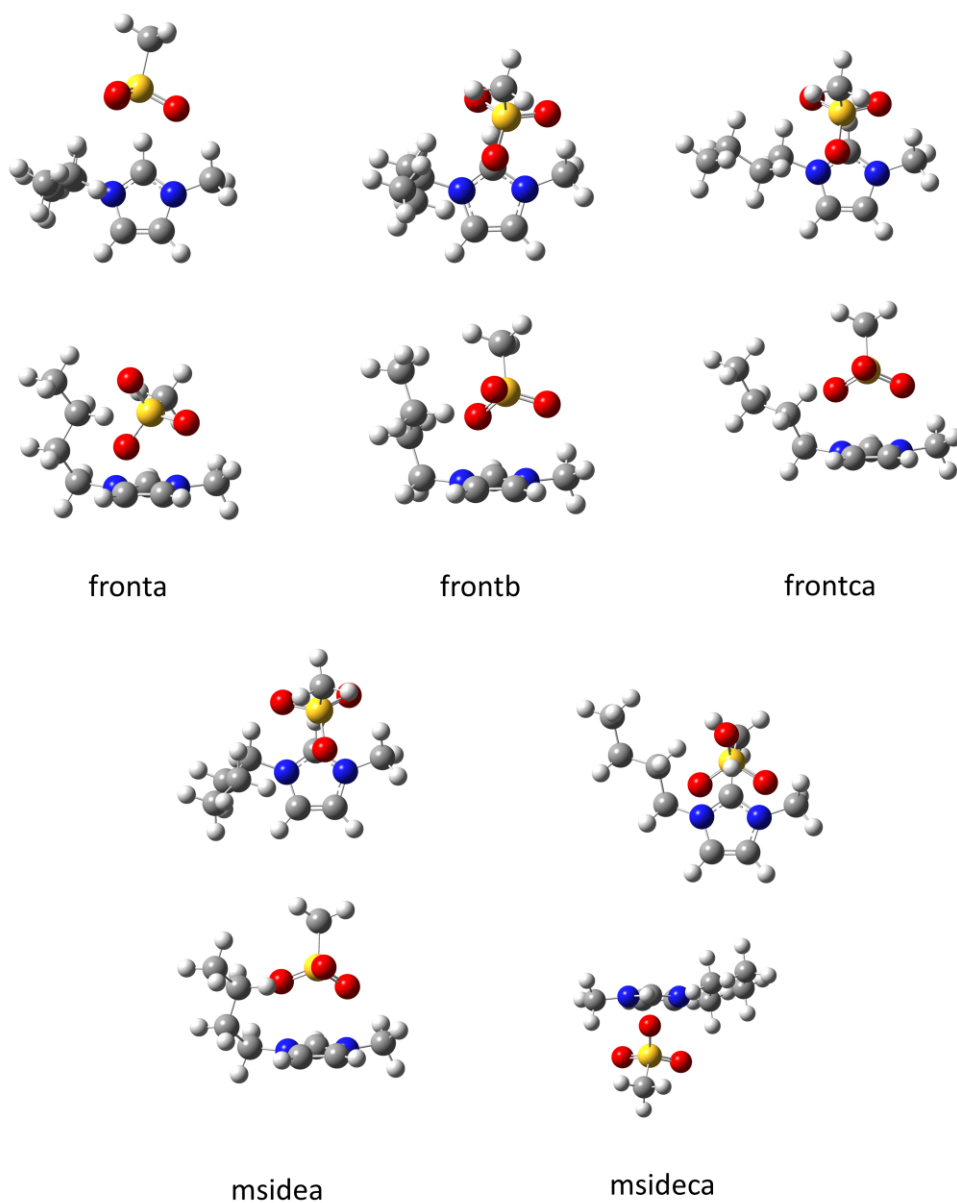

Figure S12: Optimised Ion Pair conformers for  $[\text{C}_4\text{C}_1\text{Im}][\text{MeOSO}_3]$ .

| Conformer | $\Delta E(\text{ZPE}) / \text{kJ mol}^{-1}$ | $\Delta E / \text{kJ mol}^{-1}$ | $\Delta G / \text{kJ mol}^{-1}$ |
|-----------|---------------------------------------------|---------------------------------|---------------------------------|
| frontca   | 0.0                                         | 0.0                             | 0.0                             |
| frontb    | 1.0                                         | 1.1                             | 0.3                             |
| msidea    | 1.7                                         | 1.4                             | 3.8                             |
| msideca   | 2.3                                         | 2.6                             | -0.4                            |
| fronta    | 4.8                                         | 5.2                             | 3.0                             |

Table S8: Relative energies for  $[\text{C}_4\text{C}_1\text{Im}][\text{MeOSO}_3]$  Ion Pair conformers.

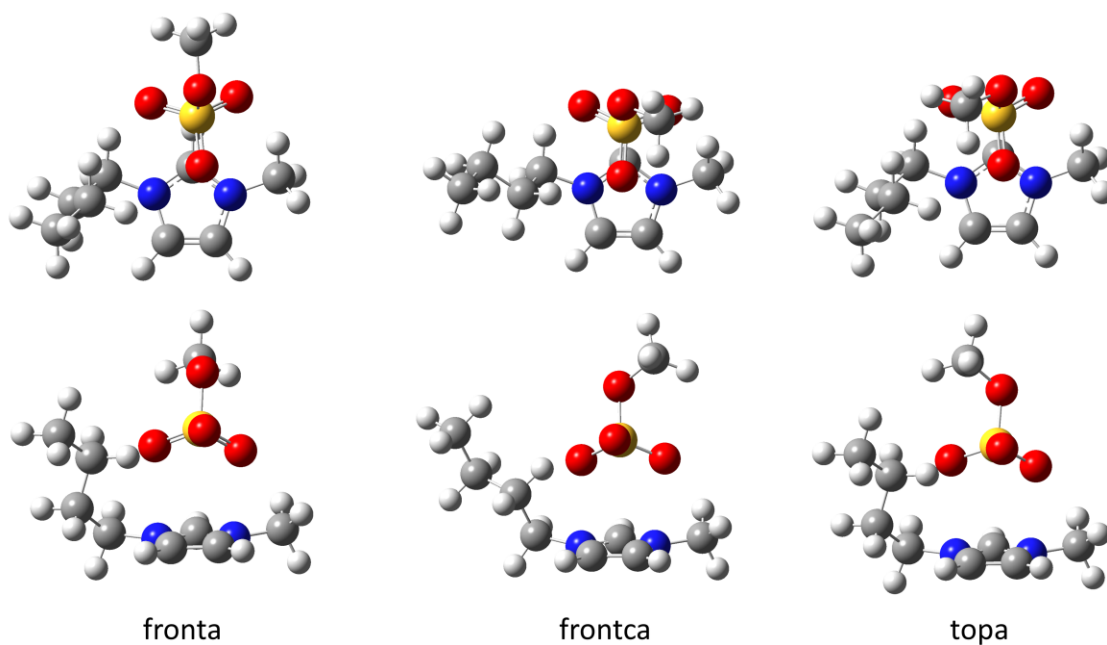

Figure S13: Optimised Ion Pair conformers for  $[\text{C}_4\text{C}_1\text{Im}][\text{MeSO}_4]$ .

| Conformer | $\Delta E(\text{ZPE}) / \text{kJ mol}^{-1}$ | $\Delta E / \text{kJ mol}^{-1}$ | $\Delta G / \text{kJ mol}^{-1}$ |
|-----------|---------------------------------------------|---------------------------------|---------------------------------|
| fronta    | 0.0                                         | 0.0                             | 0.0                             |
| topa      | 1.5                                         | 1.7                             | 0.6                             |
| frontca   | 35.5                                        | 34.3                            | 34.3                            |

Table S9: Relative energies for  $[\text{C}_4\text{C}_1\text{Im}][\text{MeSO}_4]$  Ion Pair conformers.

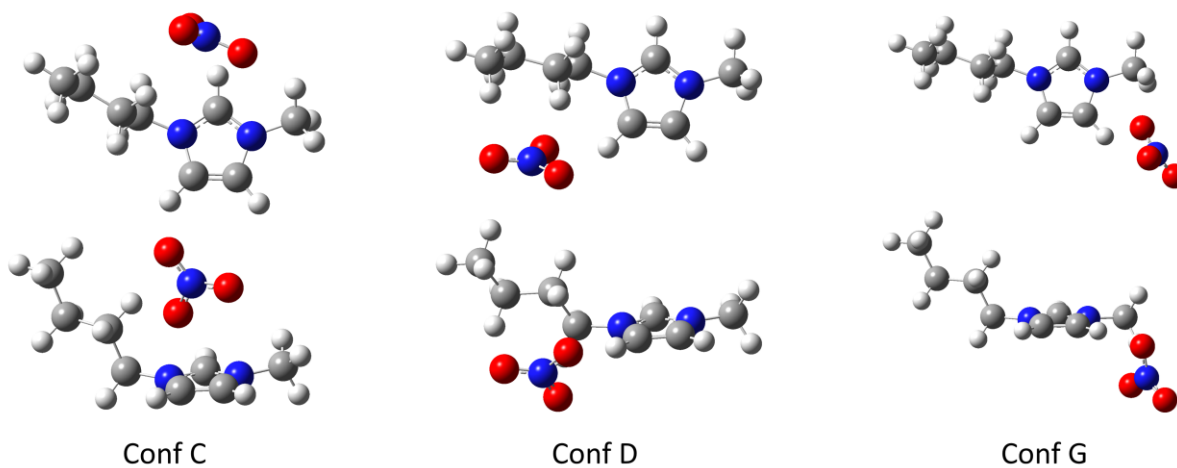

Figure S14: Optimised Ion Pair conformers for  $[\text{C}_4\text{C}_1\text{Im}][\text{NO}_3]$ .

| Conformer | $\Delta E(\text{ZPE}) / \text{kJ mol}^{-1}$ | $\Delta E / \text{kJ mol}^{-1}$ | $\Delta G / \text{kJ mol}^{-1}$ |
|-----------|---------------------------------------------|---------------------------------|---------------------------------|
| Conf C    | 0.0                                         | 0.0                             | 0.0                             |
| Conf D    | 32.4                                        | 32.9                            | 32.4                            |
| Conf G    | 40.1                                        | 41.4                            | 35.2                            |

Table S10: Relative energies for  $[\text{C}_4\text{C}_1\text{Im}][\text{NO}_3]$  Ion Pair conformers.

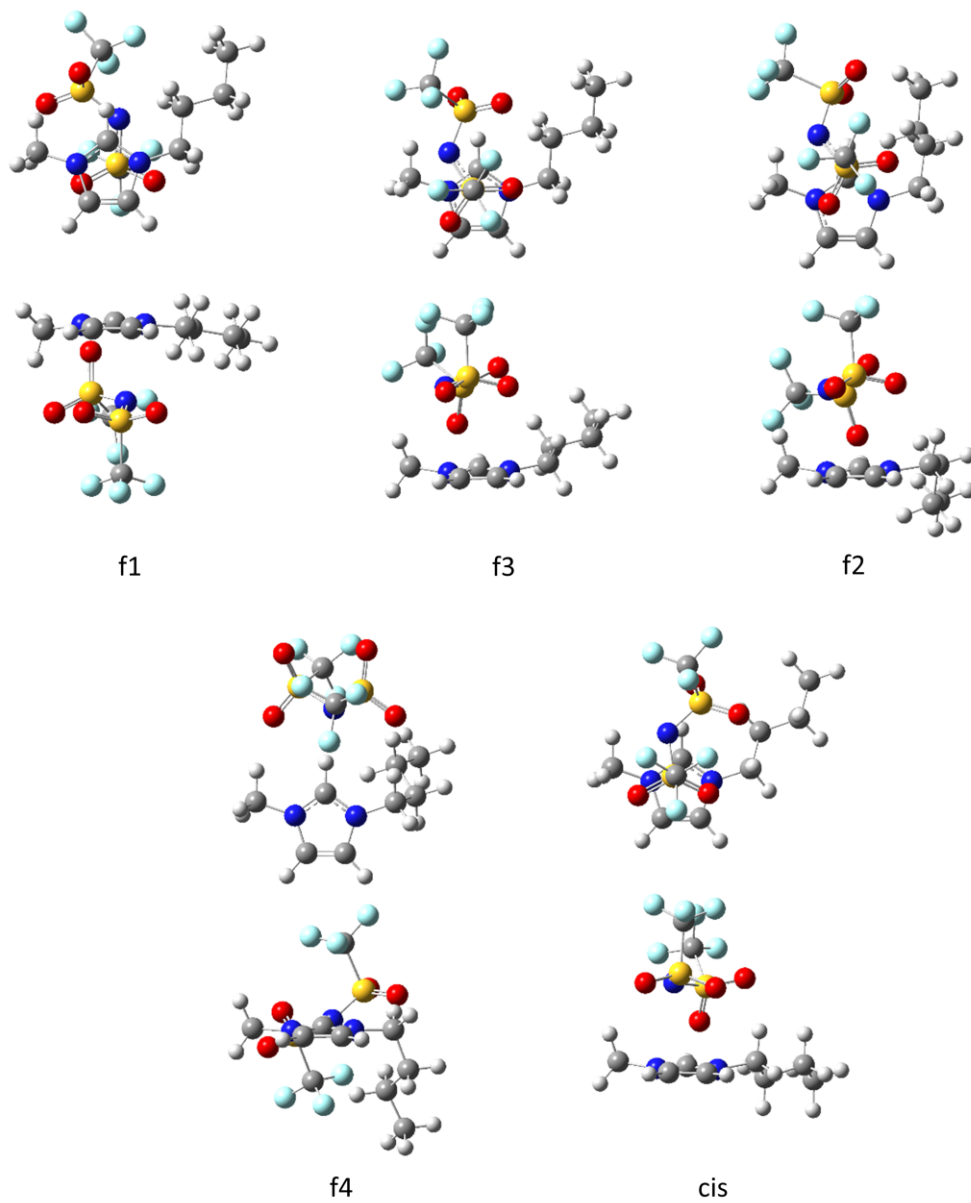

Figure S15: Optimised Ion Pair conformers for  $[\text{C}_4\text{C}_1\text{Im}][\text{NTf}_2]$ .

| Conformer | $\Delta E(ZPE) / kJ mol^{-1}$ | $\Delta E / kJ mol^{-1}$ | $\Delta G / kJ mol^{-1}$ |
|-----------|-------------------------------|--------------------------|--------------------------|
| f1        | 0.0                           | 0.0                      | 0.0                      |
| cis       | 2.2                           | 2.2                      | 3.8                      |
| f3        | 2.9                           | 3.3                      | 1.7                      |
| f2        | 4.0                           | 4.1                      | 3.4                      |
| f4        | 8.3                           | 9.3                      | 3.7                      |

Table S11:Relative energies for  $[C_4C_1Im][NTf_2]$  Ion Pair conformers.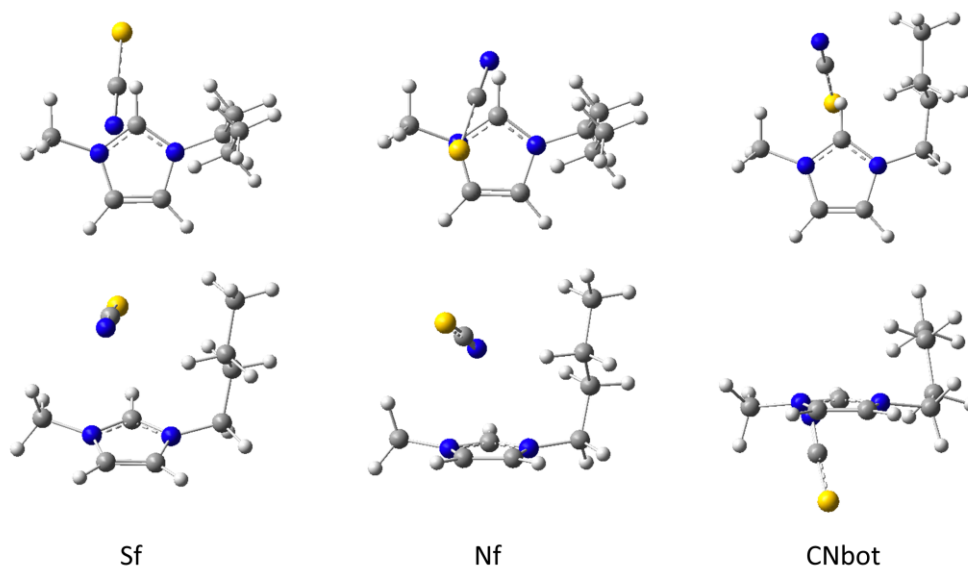Figure S16:Optimised Ion Pair conformers for  $[C_4C_1Im][SCN]$ .

| Conformer | $\Delta E(ZPE) / kJ mol^{-1}$ | $\Delta E / kJ mol^{-1}$ | $\Delta G / kJ mol^{-1}$ |
|-----------|-------------------------------|--------------------------|--------------------------|
| Sf        | 0.0                           | 0.0                      | 0.0                      |
| Nf        | 1.7                           | 1.4                      | 3.5                      |
| CNbot     | 9.6                           | 9.2                      | 4.8                      |

Table S12:Relative energies for  $[C_4C_1Im][SCN]$  Ion Pair conformers.

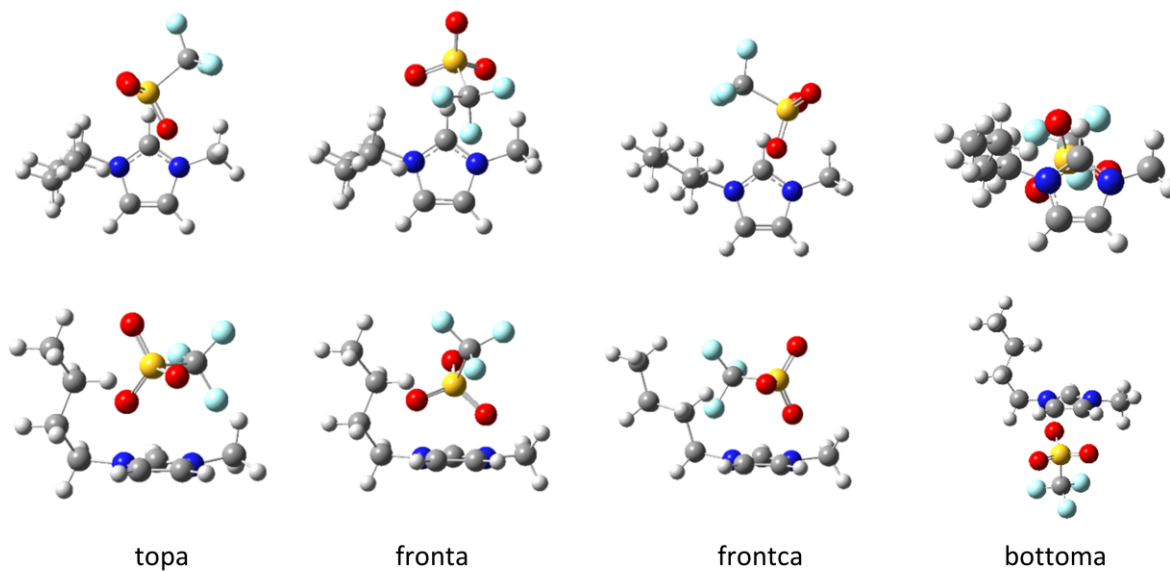

Figure S17: Optimised Ion Pair conformers for  $[\text{C}_4\text{C}_1\text{Im}][\text{TfO}]$ .

| Conformer | $\Delta E(\text{ZPE}) / \text{kJ mol}^{-1}$ | $\Delta E / \text{kJ mol}^{-1}$ | $\Delta G / \text{kJ mol}^{-1}$ |
|-----------|---------------------------------------------|---------------------------------|---------------------------------|
| fronta    | 0.0                                         | 0.0                             | 0.0                             |
| topa      | 1.3                                         | 1.6                             | -2.2                            |
| bottoma   | 4.5                                         | 5.8                             | 4.3                             |
| frontca   | 4.6                                         | 3.8                             | 4.0                             |

Table S13: Relative energies for  $[\text{C}_4\text{C}_1\text{Im}][\text{TfO}]$  Ion Pair conformers. Note the bottoma conformer has a small negative frequency ( $\approx -4\text{cm}^{-1}$ ).

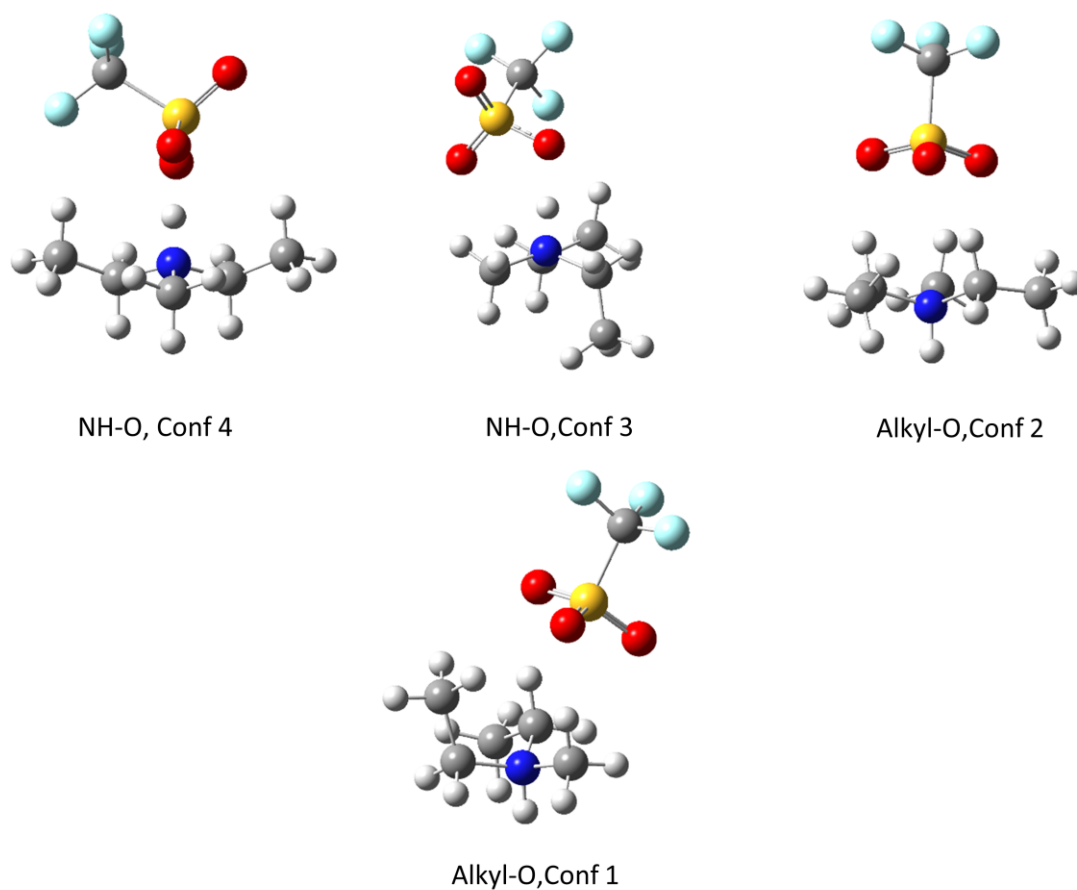

Figure S18: Optimised Ion Pair conformers for  $[\text{N}_{2,2,1,0}][\text{TfO}]$ .

| Conformer       | $\Delta E(\text{ZPE}) / \text{kJ mol}^{-1}$ | $\Delta E / \text{kJ mol}^{-1}$ | $\Delta G / \text{kJ mol}^{-1}$ |
|-----------------|---------------------------------------------|---------------------------------|---------------------------------|
| NH-O, Conf 4    | 0.0                                         | 0.0                             | 0.0                             |
| NH-O, Conf 3    | 4.5                                         | 4.2                             | 4.7                             |
| Alkyl-O, Conf 2 | 64.2                                        | 61.9                            | 61.4                            |
| Alkyl-O, Conf 1 | 72.9                                        | 71.2                            | 71.6                            |

Table S14: Relative energies for  $[\text{N}_{2,2,1,0}][\text{TfO}]$  Ion Pair conformers.

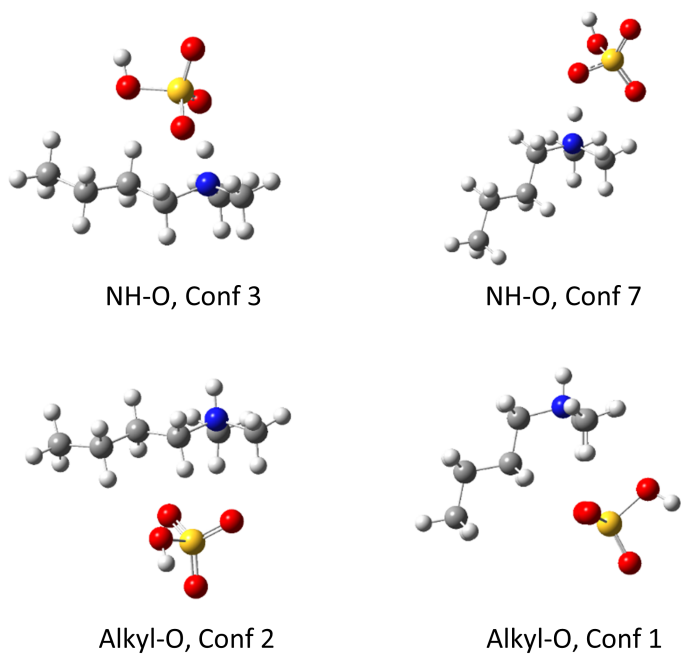Figure S19: Optimised Ion Pair conformers for  $[N_{4,1,1,0}][HSO_4]$ .

| Conformer       | $\Delta E(ZPE) / kJ mol^{-1}$ | $\Delta E / kJ mol^{-1}$ | $\Delta G / kJ mol^{-1}$ |
|-----------------|-------------------------------|--------------------------|--------------------------|
| NH-O, Conf 3    | 0.0                           | 0.0                      | 0.0                      |
| NH-O, Conf 7    | 10.1                          | 10.9                     | 6.5                      |
| Alkyl-O, Conf 2 | 65.5                          | 62.3                     | 65.0                     |
| Alkyl-O, Conf 1 | 79.6                          | 77.6                     | 77.0                     |

Table S15: Relative energies for  $[N_{4,1,1,0}][HSO_4]$  Ion Pair conformers.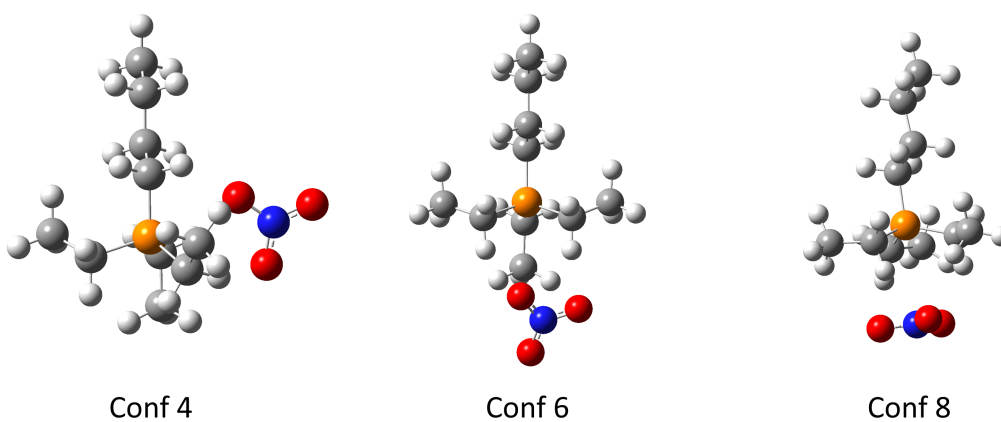Figure S20: Optimised Ion Pair conformers for  $[P_{2,2,2,4}][NO_3]$ .

| Conformer | $\Delta E(ZPE) / kJ mol^{-1}$ | $\Delta E / kJ mol^{-1}$ | $\Delta G / kJ mol^{-1}$ |
|-----------|-------------------------------|--------------------------|--------------------------|
| Conf 8    | 0.0                           | 0.0                      | 0.0                      |
| Conf 4    | 1.2                           | 0.4                      | -0.7                     |
| Conf 6    | 13.5                          | 15.3                     | 7.2                      |

Table S16: Relative energies for  $[P_{2,2,2,4}][NO_3]$  Ion Pair conformers.



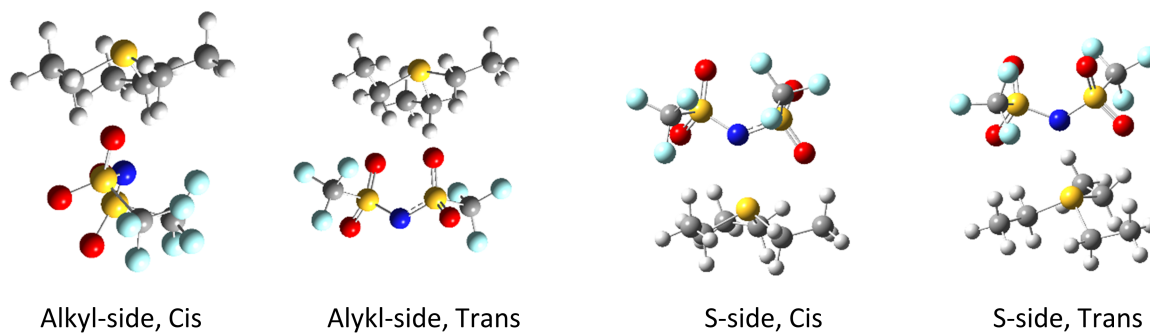Figure S21: Optimised Ion Pair conformers for  $[S_{2,2,2}][NTf_2]$ .

| Conformer         | $\Delta E(ZPE) / kJ mol^{-1}$ | $\Delta E / kJ mol^{-1}$ | $\Delta G / kJ mol^{-1}$ |
|-------------------|-------------------------------|--------------------------|--------------------------|
| Alkyl-side, Cis   | 0.0                           | 0.0                      | 0.0                      |
| Alkyl-side, Trans | 2.4                           | 2.5                      | 3.6                      |
| S-side, Trans     | 14.5                          | 14.2                     | 14.0                     |
| S-side, Cis       | 23.4                          | 23.4                     | 27.3                     |

Table S17: Relative energies for  $[S_{2,2,2}][NTf_2]$  Ion Pair conformers.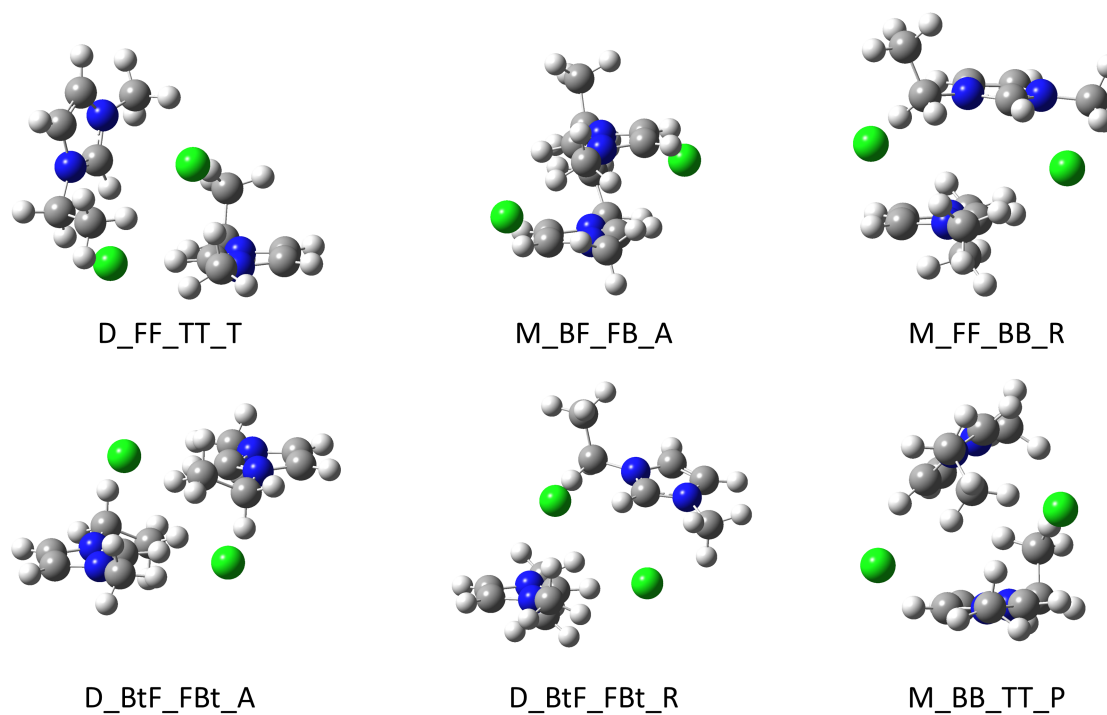Figure S22: Optimised Dimer conformers for  $[C_2C_1Im]Cl$ .

| Conformer   | $\Delta E(ZPE) / kJ mol^{-1}$ | $\Delta E / kJ mol^{-1}$ | $\Delta G / kJ mol^{-1}$ |
|-------------|-------------------------------|--------------------------|--------------------------|
| D_FF_TT_T   | 0.0                           | 0.0                      | 0.0                      |
| M_BF_FB_A   | 0.2                           | 0.5                      | 0.8                      |
| M_FF_BB_R   | 1.4                           | 2.4                      | 0.1                      |
| D_BtF_FBt_A | 3.8                           | 3.9                      | 5.6                      |
| D_BtF_FBt_R | 5.3                           | 6.8                      | -6.2                     |
| M_BB_TT_P   | 32.2                          | 33.1                     | 36.6                     |

Table S18:Relative energies for  $[C_2C_1Im]Cl$  Dimer conformers.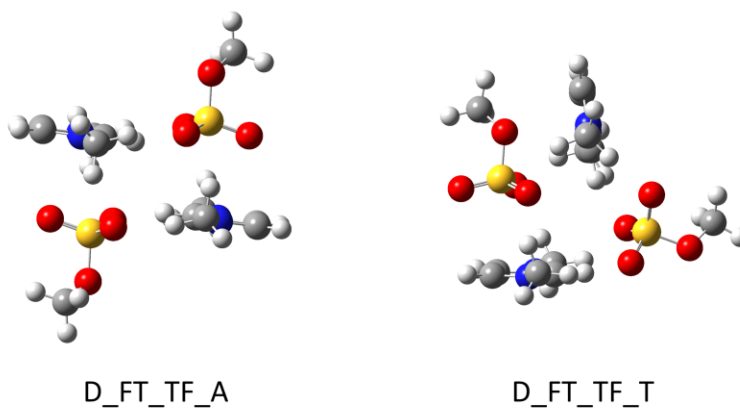Figure S23:Optimised Dimer conformers for  $[C_1C_1Im][MeSO_4]$ .

| Conformer | $\Delta E(ZPE) / kJ mol^{-1}$ | $\Delta E / kJ mol^{-1}$ | $\Delta G / kJ mol^{-1}$ |
|-----------|-------------------------------|--------------------------|--------------------------|
| D_FT_TF_A | 0.0                           | 0.0                      | 0.0                      |
| D_FT_TF_T | 3.4                           | 2.8                      | 7.3                      |

Table S19:Relative energies for  $[C_1C_1Im][MeSO_4]$  Dimer conformers.
